# Supplementary material for: Enzyme immobilization on covalent organic framework supports
Source: Springer Nature journal article supplement (doi:10.1038/s41596-023-00868-x), 2023-09-06
Supplement: MOESM1 [file 41596_2023_868_MOESM1_ESM24.pdf]

---

# Enzyme immobilization on covalent organic framework supports

---

In the format provided by the authors and unedited

# Enzyme Immobilization on Covalent Organic Framework Supports

Qianqian Zhu,<sup>#ab</sup> Yunlong Zheng,<sup>#ac</sup> Zhenjie Zhang<sup>\*ab</sup> and Yao Chen<sup>\*ac</sup>

<sup>a</sup> State Key Laboratory of Medicinal Chemical biology, Nankai University, Tianjin 300071, P.R. China

<sup>b</sup> College of Chemistry, Nankai University, Tianjin 300071, P.R. China

<sup>c</sup> College of Pharmacy, Nankai University, Tianjin 300071, P.R. China

\*Corresponding author: zhangzhenjie@nankai.edu.cn, chenyaoyao@nankai.edu.cn

**Supplementary Figure 1** | FT-IR spectrums of BSA, BSA@ZPF-2, BSA@ZPF-2@COF-42-B and BSA@COF-42-B.

**Supplementary Figure 2** | **(a)** N<sub>2</sub> adsorption isotherms and **(b)** pore size distribution calculated based on DFT method.

**Supplementary Figure 3** | PXRD patterns of BSA@ZPF-2@COF-42-B with different etching time.

**Supplementary Figure 4** | **(a)** PXRD patterns and **(b)** TEM images of BSA@ZIF-90@COF-43-B before and after etching.

**Supplementary Figure 5** | Adsorption curve of COF-42-B for BSA.

**Supplementary Figure 6** | The leakage test for CAT during the process of etching. The result revealed that there was negligible leakage during this process.

**Supplementary Figure 7** | **(a)** Recycling experiments of CAT@COF-42-B. **(b)** The leakage of CAT@COF-42-B during 10 catalysis cycles.

**Supplementary Figure 8** | Loading amounts **(a)** and leaking percentages **(b)** of immobilization systems in the experience.

**Supplementary Figure 9** | Adsorption kinetic curve of Lipase@NKCOF-100 **(a)** and Lipase@ MCM-41 **(b)**

**Supplementary Figure 10** | Confocal laser scanning microscopy (CLSM) of NKCOF-98 **(a)** and Lipase-FITC@NKCOF-98 prepared by physical adsorption **(b)**.

**Supplementary Figure 11** | Energy dispersive spectrometer (EDS) element mapping

of NKCOF-98.

**Supplementary Figure 12** |  $^1\text{H}$  NMR spectra of aspirin methyl ester (AME) and the product of AME hydrolysis by Lipase@NKCOF-98.

**Supplementary Figure 13** |  $^1\text{H}$  NMR spectra of aspirin methyl ester (AME) and the product of AME hydrolysis by Lipase@NKCOF-99.

**Supplementary Figure 14** |  $^1\text{H}$  NMR spectra of aspirin methyl ester (AME) and the product of AME hydrolysis by Lipase@ZIF-8.

**Supplementary Figure 15** |  $^1\text{H}$  NMR spectra of aspirin methyl ester (AME) and the product of AME hydrolysis by Lipase@MCM-41.

**Supplementary Figure 16** |  $^1\text{H}$  NMR spectra of aspirin methyl ester (AME) and the product of AME hydrolysis by Lipase@NKCOF-100.

**Supplementary Table 1** | Analytical conditions.

**Supplementary Figure 17** | Catalytic reaction results (HPLC) of various Lipase@materials in the period of 12 h.

**Supplementary Figure 18** | Catalytic reaction results (HPLC) of free lipase, Lipase@NKCOF-98 and Lipase@NKCOF-99 in chiral resolution of R, S-1-(p-tolyl)ethanol.

**Supplementary Figure 19** | Catalytic reaction results (HPLC) of free lipase, Lipase@NKCOF-98 and Lipase@NKCOF-99 in chiral resolution of R, S-1-(4-fluorophenyl)ethanol.

**Supplementary Figure 20** | Catalytic reaction results (HPLC) of free lipase, Lipase@NKCOF-98 and Lipase@NKCOF-99 in chiral resolution of R, S-1-Phenyl-2-propanol.

**Supplementary Figure 21** | Catalytic reaction results (HPLC) of free lipase, Lipase@NKCOF-98 and Lipase@NKCOF-99 in chiral resolution of R, S-1-Phenyl-1-propanol.

**Supplementary Figure 22** | Catalytic reaction results (HPLC) of free lipase, Lipase@NKCOF-98 and Lipase@NKCOF-99 in chiral resolution of R, S-1-(1-Naphthyl)ethanol.

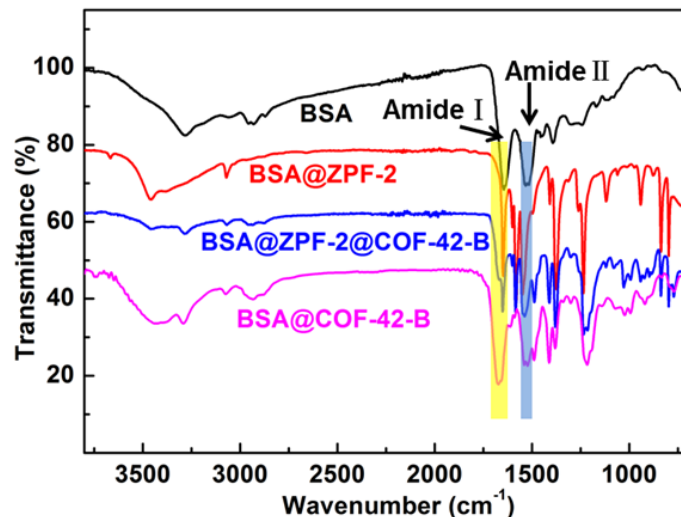

**Supplementary Figure 1** | FT-IR spectrums of BSA, BSA@ZPF-2, BSA@ZPF-2@COF-42-B and BSA@COF-42-B. (amide I mainly from C=O stretching mode and II band mainly from a combination between of NH bending and CN stretching modes).

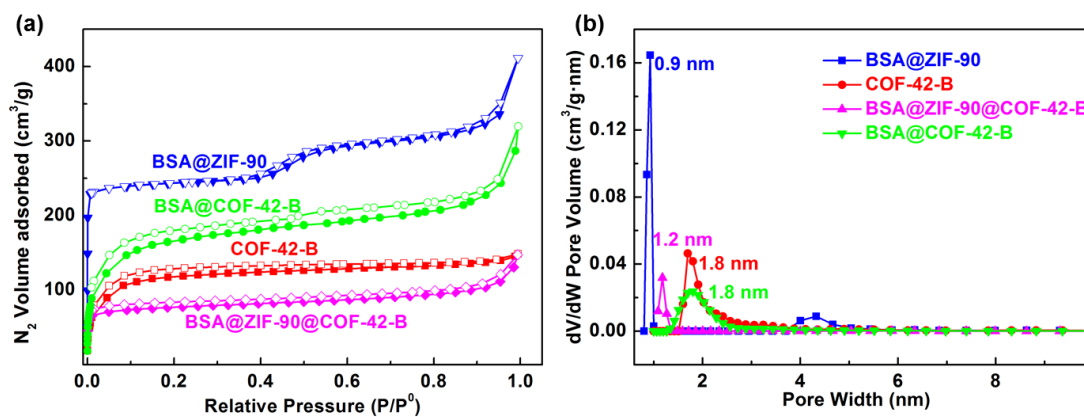

**Supplementary Figure 2** | (a) N<sub>2</sub> adsorption isotherms and (b) pore size distribution calculated based on DFT method for BSA@ZIF-90 (blue), COF-42-B (red), BSA@ZIF-90@COF-42-B (purple) and BSA@COF-42-B (green).

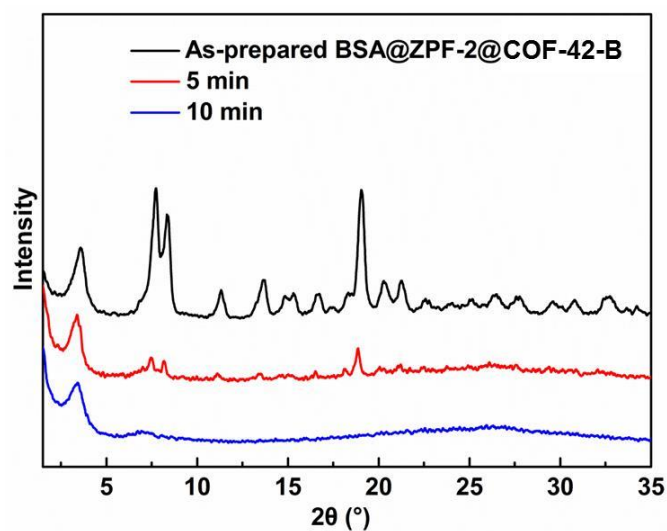

**Supplementary Figure 3** | PXRD patterns of BSA@ZPF-2@COF-42-B with different etching time.

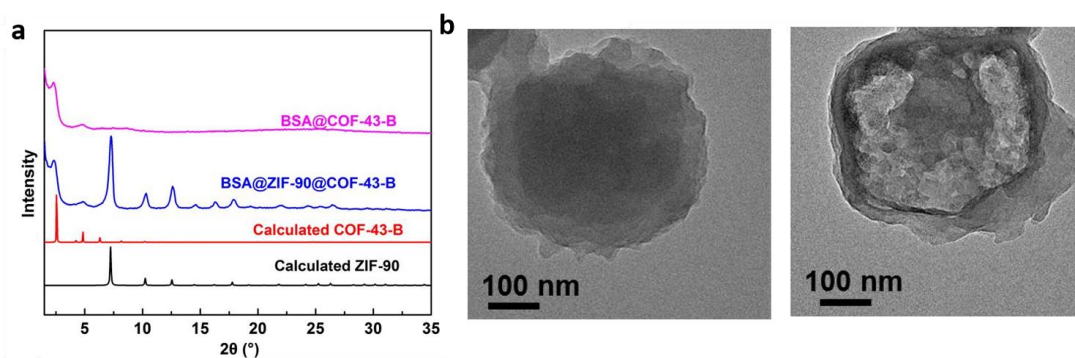

**Supplementary Figure 4** | (a) PXRD patterns and (b) TEM images of BSA@ZIF-90@COF-43-B before and after etching.

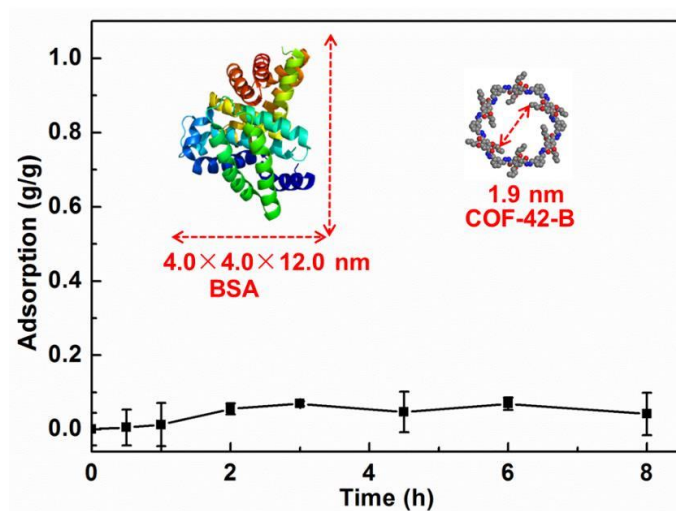

**Supplementary Figure 5** | Adsorption curve of COF-42-B for BSA. Because the pore

of COF-42-B is not big enough to accommodate BSA, there is almost no uptake observed for BSA.

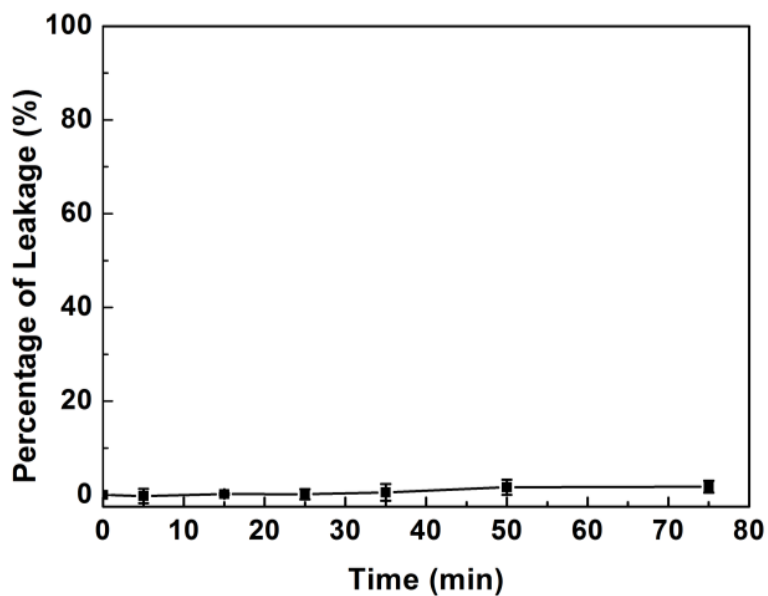

**Supplementary Figure 6** | The leakage test for CAT during the process of etching. The result revealed that there was negligible leakage during this process.

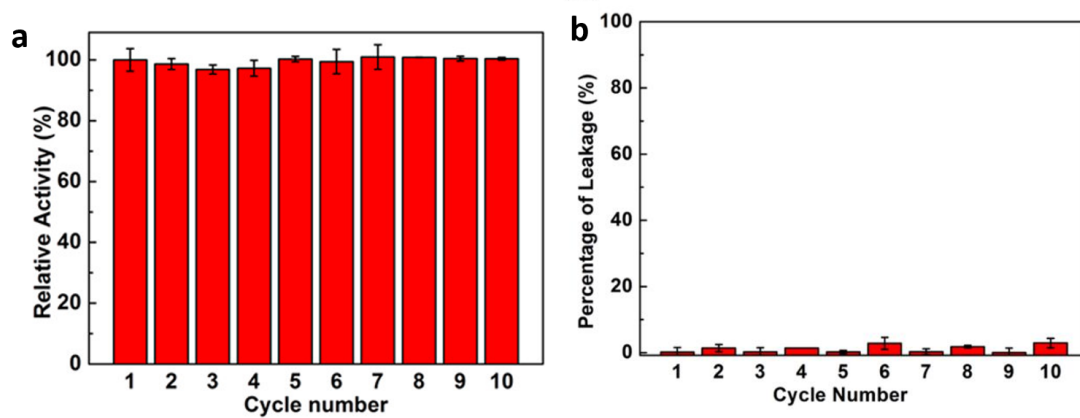

**Supplementary Figure 7** | (a) Recycling experiments of CAT@COF-42-B. (b) The leakage of CAT@COF-42-B during 10 catalysis cycles.

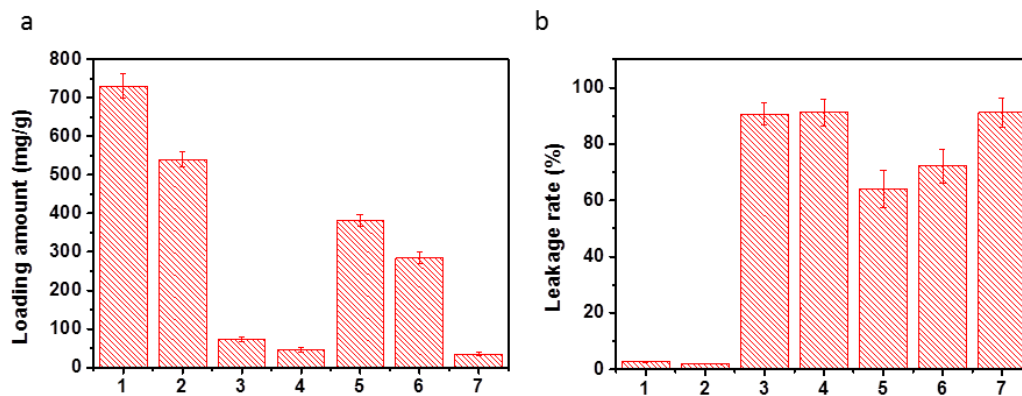

**Supplementary Figure 8** | Loading amounts (a) and leaking percentages (b) of immobilization systems in the experience. (1) Lipase@NKCOF-98 (in-situ); (2) Lipase@NKCOF-99 (in-situ); (3) Lipase@NKCOF-98 (adsorption); (4) Lipase@NKCOF-99 (adsorption); (5) Lipase@NKCOF-100 (adsorption); (6) Lipase@MCM-41 (adsorption) and (7) Lipase@activated carbon (adsorption).

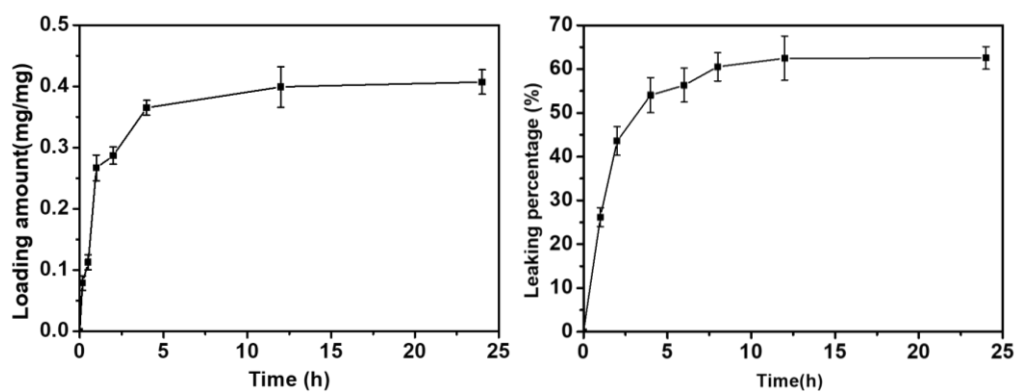

**Supplementary Figure 9** | Adsorption kinetic curve of Lipase@NKCOF-100 (a) and Lipase@ MCM-41 (b).

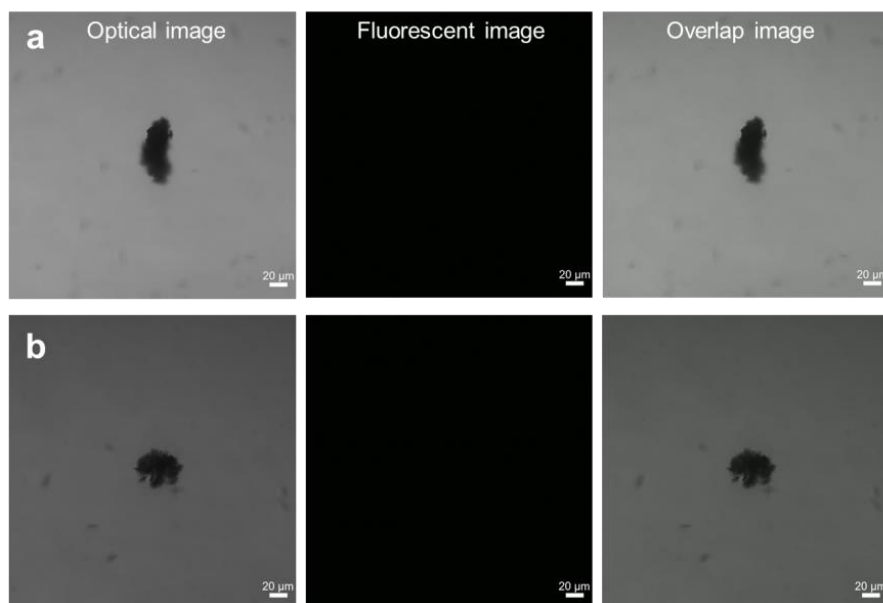

**Supplementary Figure 10** | Confocal laser scanning microscopy (CLSM) of NKCOF-98 (a) and Lipase-FITC@NKCOF-98 prepared by physical adsorption (b).

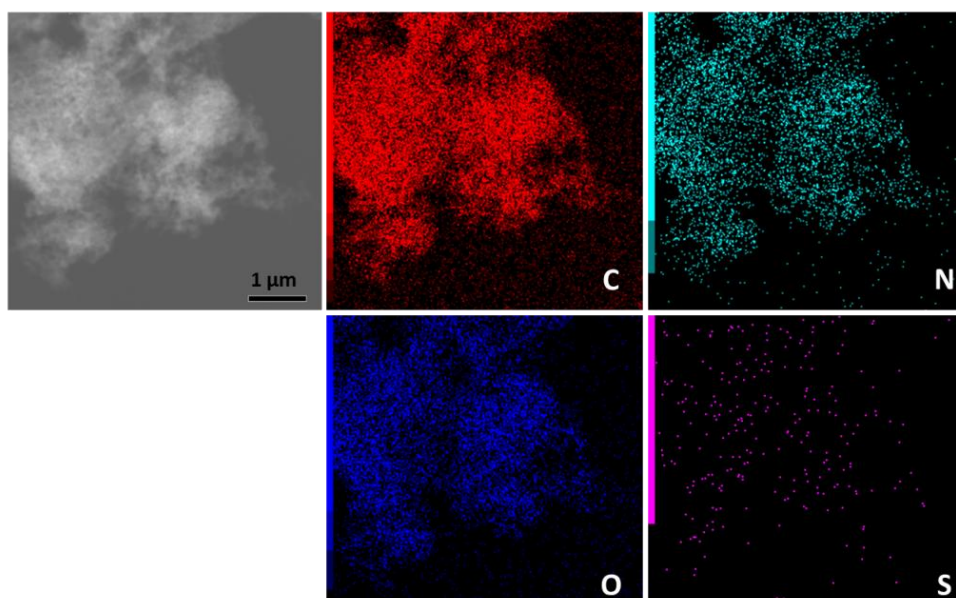

**Supplementary Figure 11** | Energy dispersive spectrometer (EDS) element mapping of NKCOF-98.

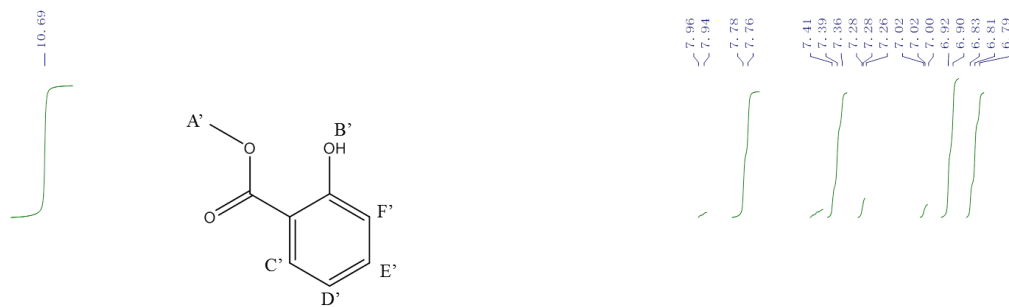

Conversion rate =  $4.12 / 4.48 = 91.96\%$

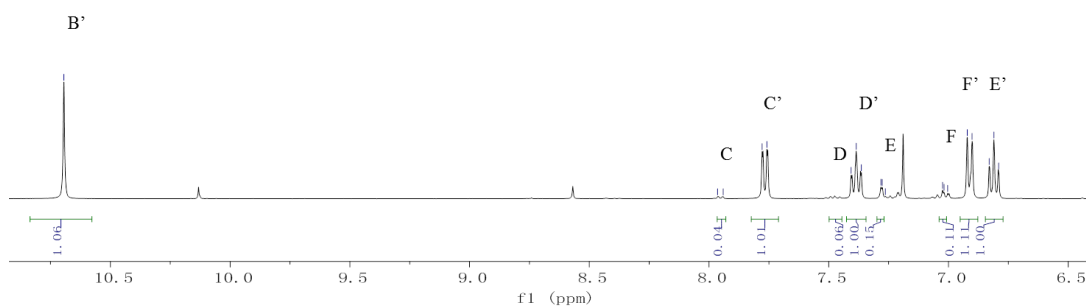

**Supplementary Figure 12** | <sup>1</sup>H NMR spectra of aspirin methyl ester (AME) and the product of AME hydrolysis by Lipase@NKCOF-98.

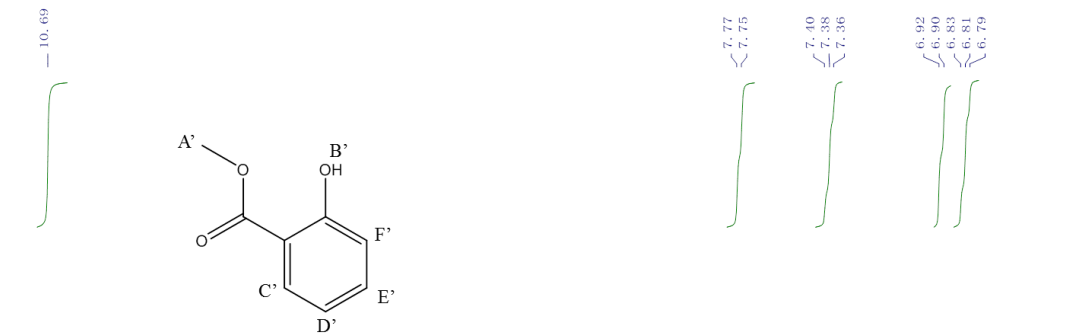

Conversion rate = 100%

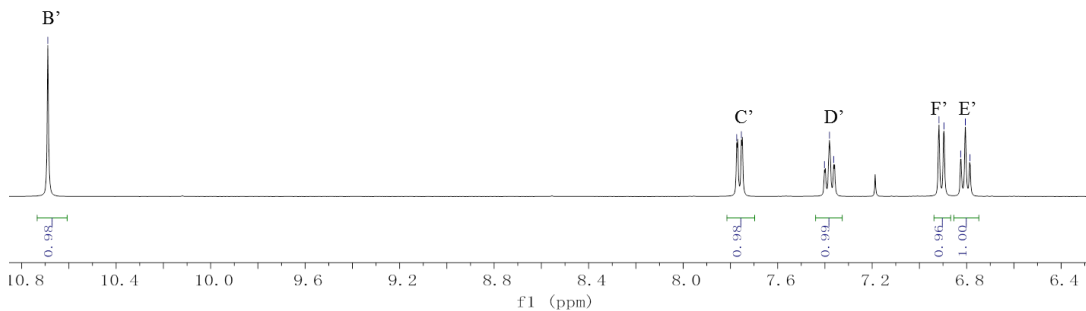

**Supplementary Figure 13** | <sup>1</sup>H NMR spectra of aspirin methyl ester (AME) and the product of AME hydrolysis by Lipase@NKCOF-99.

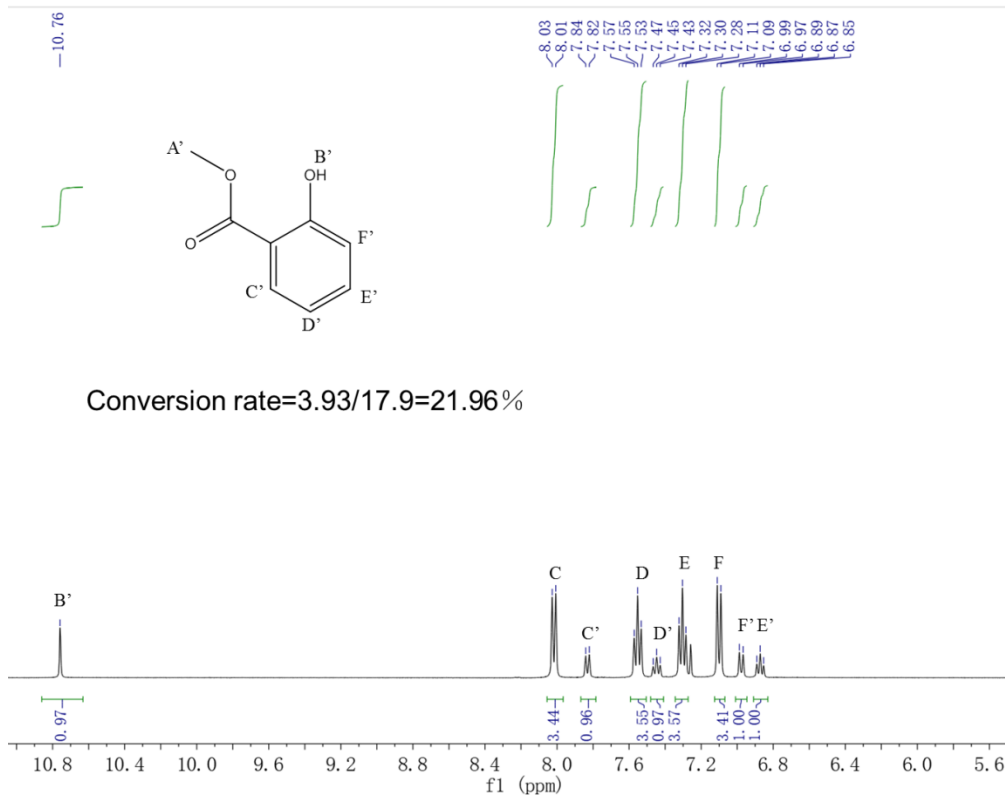

**Supplementary Figure 14** | <sup>1</sup>H NMR spectra of aspirin methyl ester (AME) and the product of AME hydrolysis by Lipase@ZIF-8.

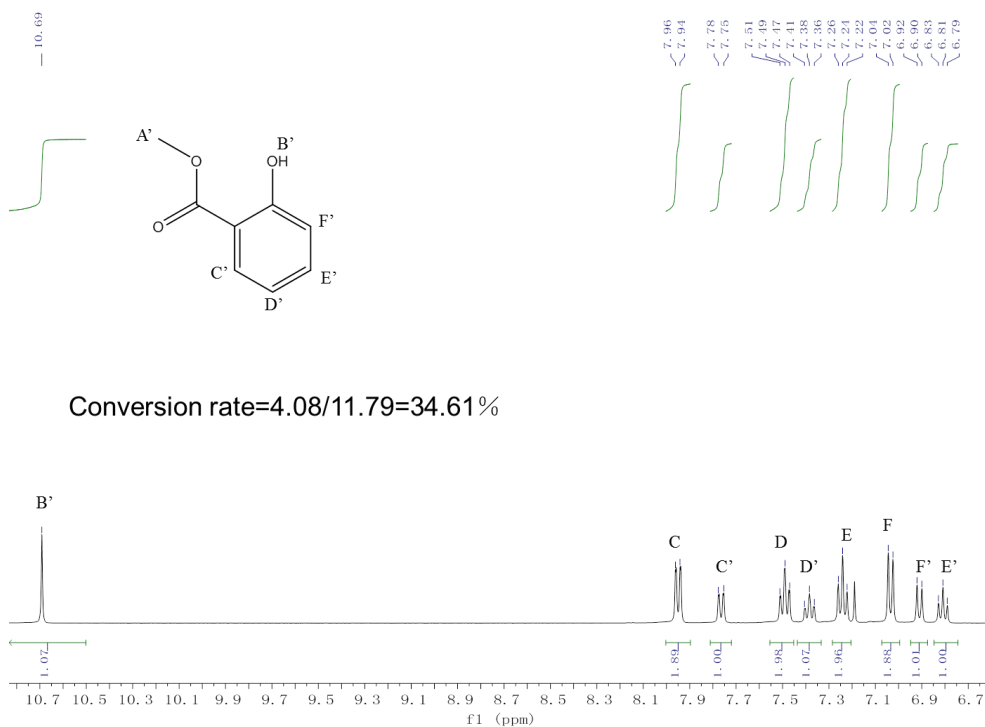

**Supplementary Figure 15** | <sup>1</sup>H NMR spectra of aspirin methyl ester (AME) and the product of AME hydrolysis by Lipase@MCM-41.

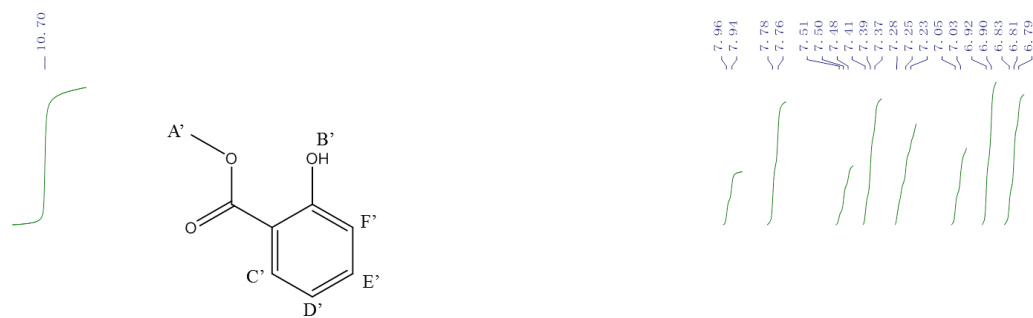

Conversion rate=4/6.22=64.31%

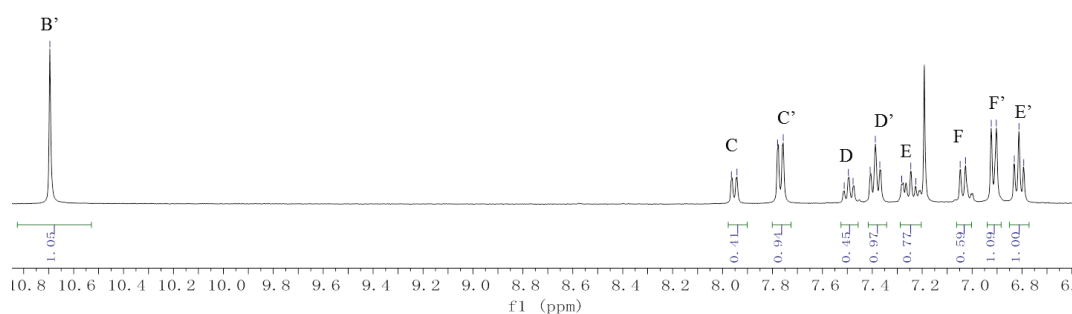

**Supplementary Figure 16** |  $^1\text{H}$  NMR spectra of aspirin methyl ester (AME) and the product of AME hydrolysis by Lipase@NKCOF-100.

**Supplementary Table 1** | Analytical conditions.

| Racemic alcohol                                                                     | Mobile Phase (v/v)    | Current Speed (mL/min) | Detection Wavelength (nm) |
|-------------------------------------------------------------------------------------|-----------------------|------------------------|---------------------------|
|                                                                                     | n-hexane /isopropanol |                        |                           |
| 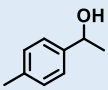 | 97/3                  | 1.0                    | 254                       |
|  | 97/3                  | 1.0                    | 254                       |
|  | 97/3                  | 1.0                    | 254                       |
|                                                                                     | n-hexane/MeOH /EtOH   |                        |                           |

|                                                                                   |            |     |     |
|-----------------------------------------------------------------------------------|------------|-----|-----|
| 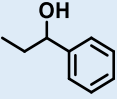 | 99/0.5/0.5 | 1.0 | 254 |
|  | 99/0.5/0.5 | 1.0 | 254 |

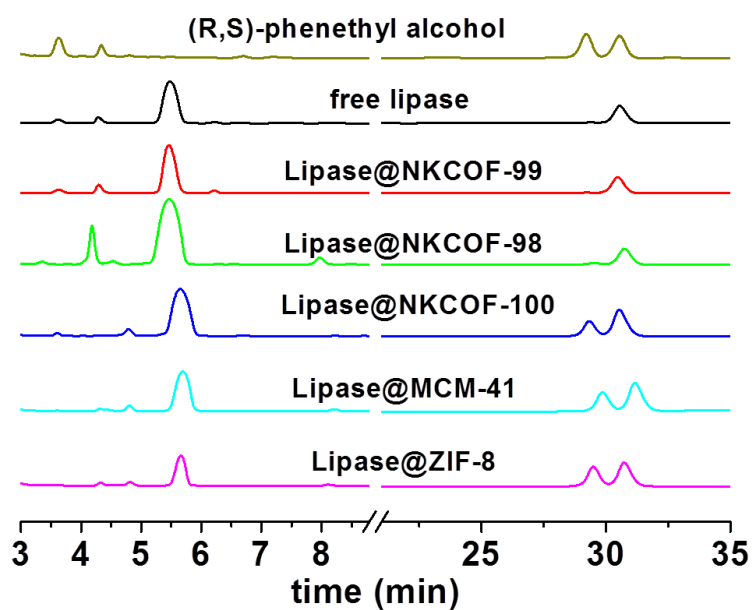

**Supplementary Figure 17** | Catalytic reaction results (HPLC) of various Lipase@materials in the period of 12 h.

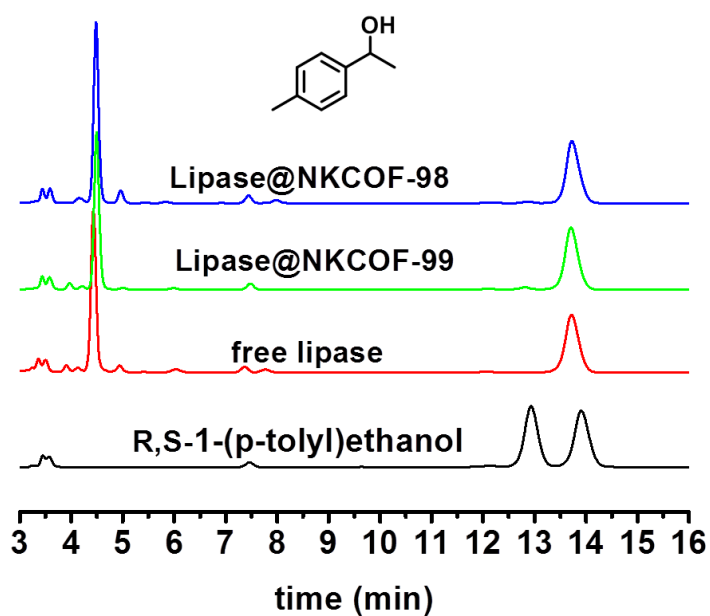

**Supplementary Figure 18** | Catalytic reaction results (HPLC) of free lipase, Lipase@NKCOF-98 and Lipase@NKCOF-99 in chiral resolution of R, S-1-(p-tolyl)ethanol.

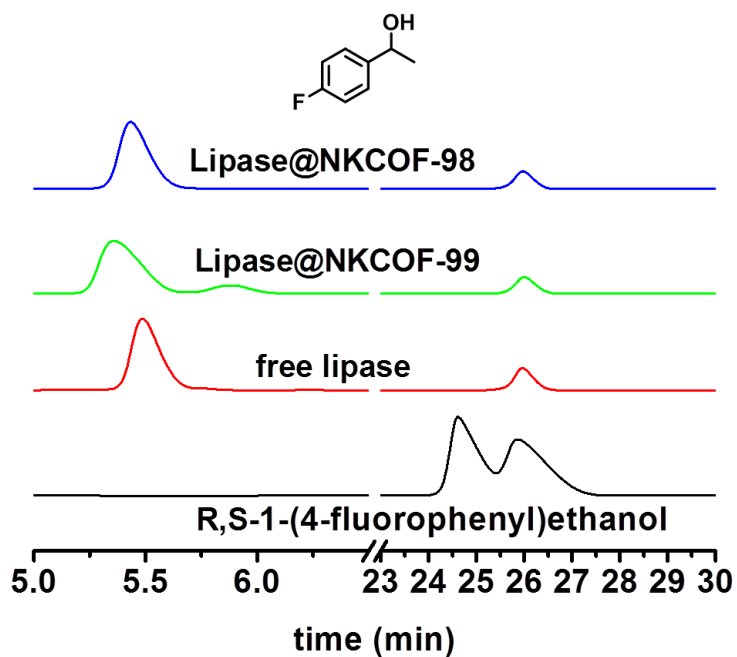

**Supplementary Figure 19** | Catalytic reaction results (HPLC) of free lipase, Lipase@NKCOF-98 and Lipase@NKCOF-99 in chiral resolution of R, S-1-(4-fluorophenyl)ethanol.

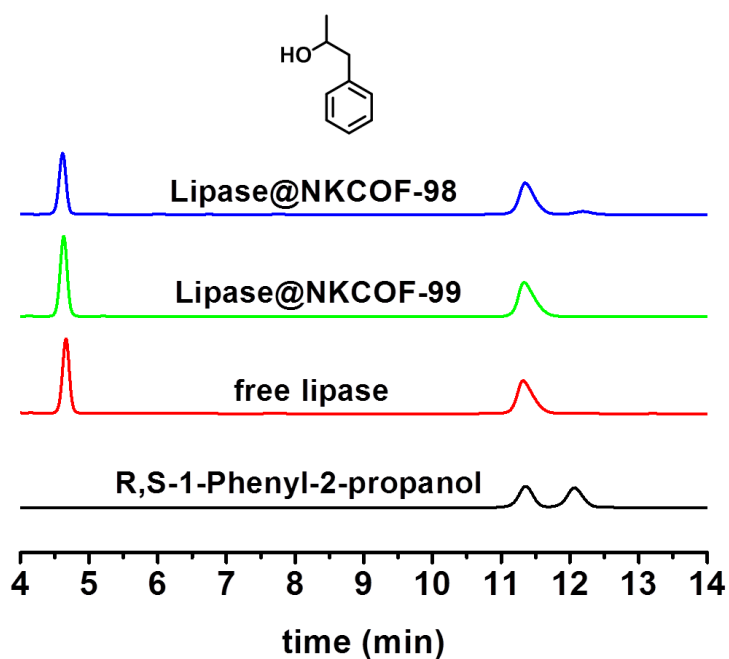

**Supplementary Figure 20** | Catalytic reaction results (HPLC) of free lipase, Lipase@NKCOF-98 and Lipase@NKCOF-99 in chiral resolution of R, S-1-Phenyl-2-propanol.

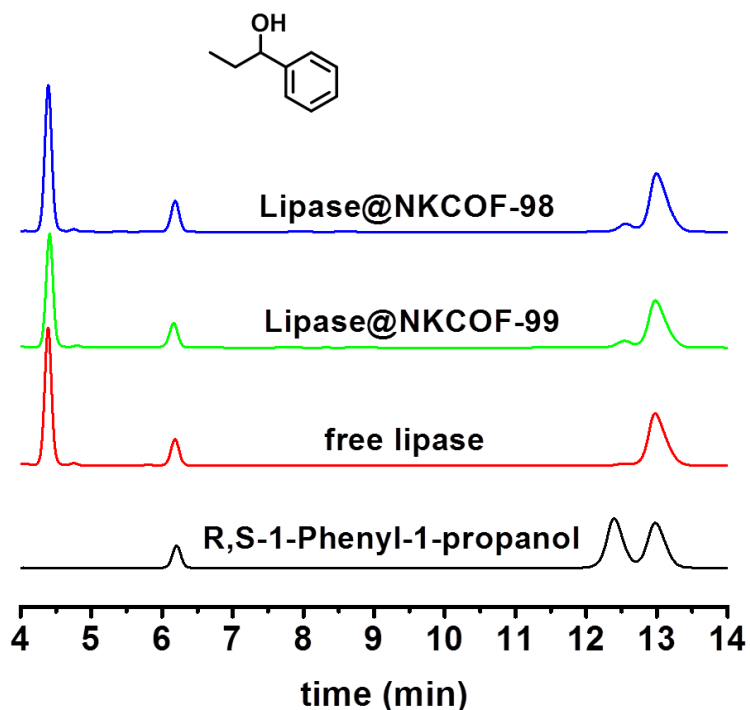

**Supplementary Figure 21** | Catalytic reaction results (HPLC) of free lipase, Lipase@NKCOF-98 and Lipase@NKCOF-99 in chiral resolution of R, S-1-Phenyl-1-propanol.

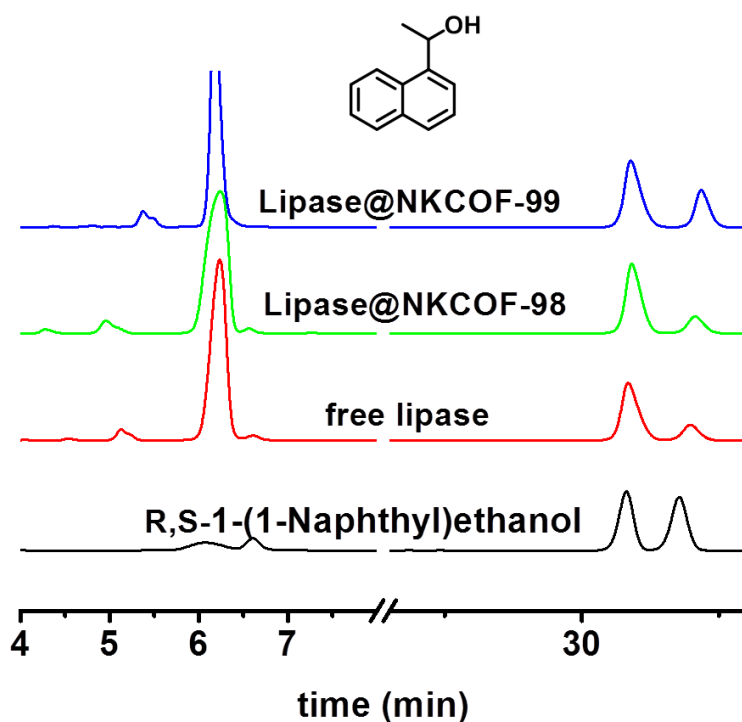

**Supplementary Figure 22** | Catalytic reaction results (HPLC) of free lipase, Lipase@NKCOF-98 and Lipase@NKCOF-99 in chiral resolution of R, S-1-(1-Naphthyl) ethanol.
